# Supplementary material for: Reconstruction of pyrrolo[2,3-b]indoles carrying an α-configured reverse C3-dimethylallyl moiety by using recombinant enzymes
Source: Royal Society of Chemistry journal article supplement (doi:10.1039/b922440h), 2010-01-01
Supplement: b922440h.pdf [file b922440h.pdf]

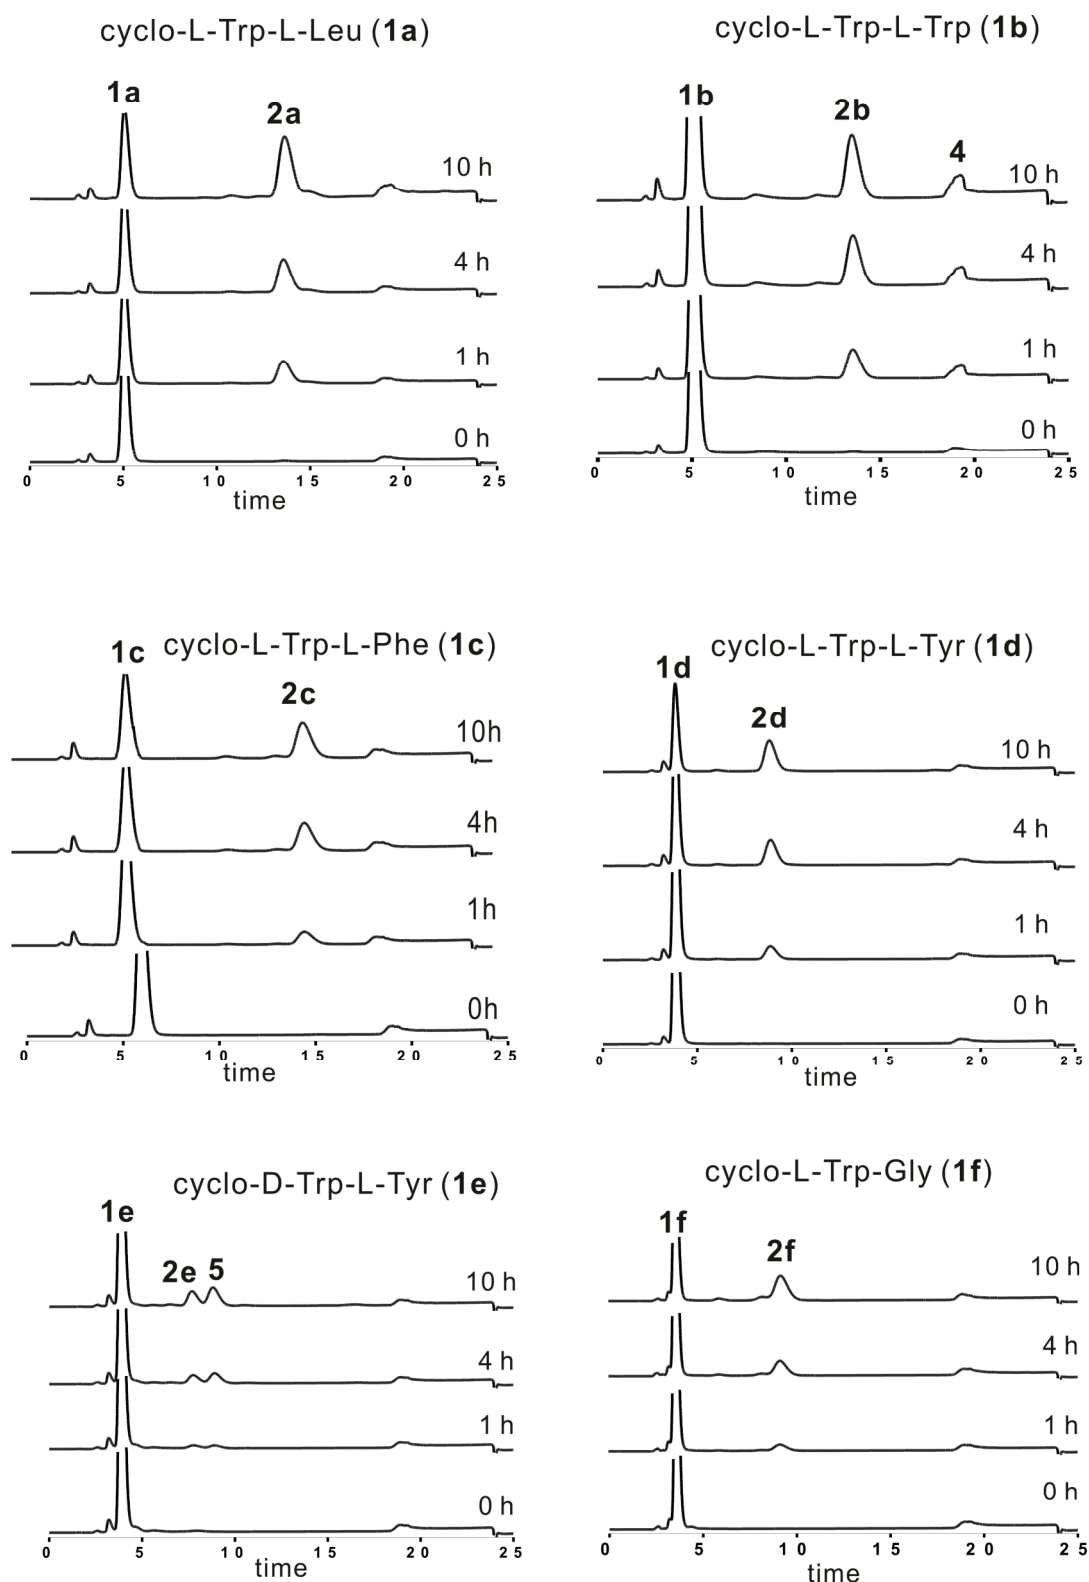

Figure S1 HPLC chromatograms of enzyme assays (100  $\mu$ L). The incubation mixtures contained substrates **1a** to **1f** (1 mM), DMAPP (1 mM),  $\text{CaCl}_2$  (5 mM), Tris-HCl (50 mM, pH 7.5), glycerol 1.5 % (v/v) as well as AnaPT (0.54  $\mu$ M) and were incubated at 37° C for 0, 1, 4 and 10 h, respectively. Detection was carried out with a Photo Diode Array detector and illustrated for absorption at 254 nm.
